# Supplementary material for: The Study of the Frequency Effect of Dynamic Compressive Loading on Primary Articular Chondrocyte Functions Using a Microcell Culture System
Source: Biomed Res Int. 2014 Apr 16;2014:762570. doi: 10.1155/2014/762570 (PMC4009256; doi:10.1155/2014/762570)
Supplement: Supplementary file 1 — The video clip demonstrated the dynamic process of compressive loading (1 Hz, 30% strain) working onto the 3D cell culture constructs (light-yellow colored) within the microcell culture system (composed by 3 individual microbioreactors in this video clip). [file 762570.f1.zip]

Archive with 1 entries (1 files):
- 762570.f1/(762570)supplementary material.avi
